# Supplementary material for: Common mouse models of tauopathy reflect early but not late human disease
Source: PubMed Central journal article supplement (PMC9893608; doi:10.1186/s13024-023-00601-y), 2023-02-02

A

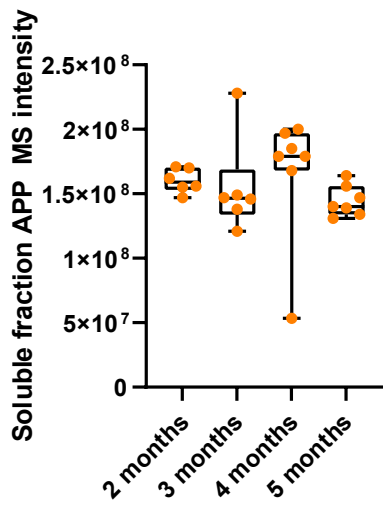

B

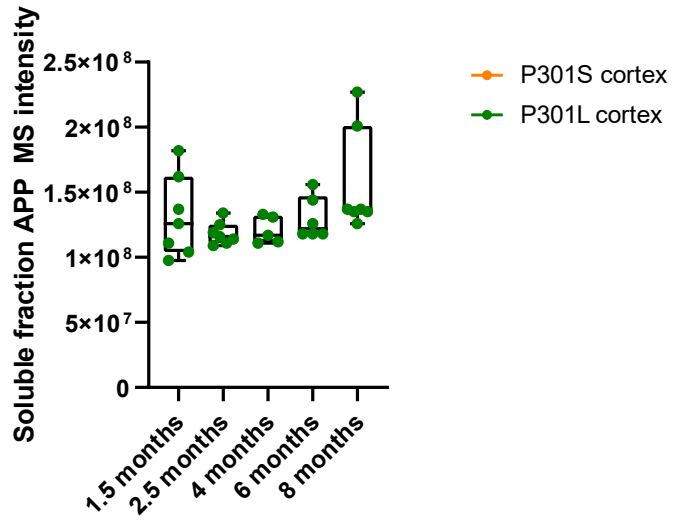

Supplement: 13024_2023_601_MOESM2_ESM.pdf [file 13024_2023_601_MOESM2_ESM.pdf]
