# Supplementary material for: Common mouse models of tauopathy reflect early but not late human disease
Source: PubMed Central journal article supplement (PMC9893608; doi:10.1186/s13024-023-00601-y), 2023-02-02
Supplement: 13024_2023_601_MOESM4_ESM.pdf [file 13024_2023_601_MOESM4_ESM.pdf]

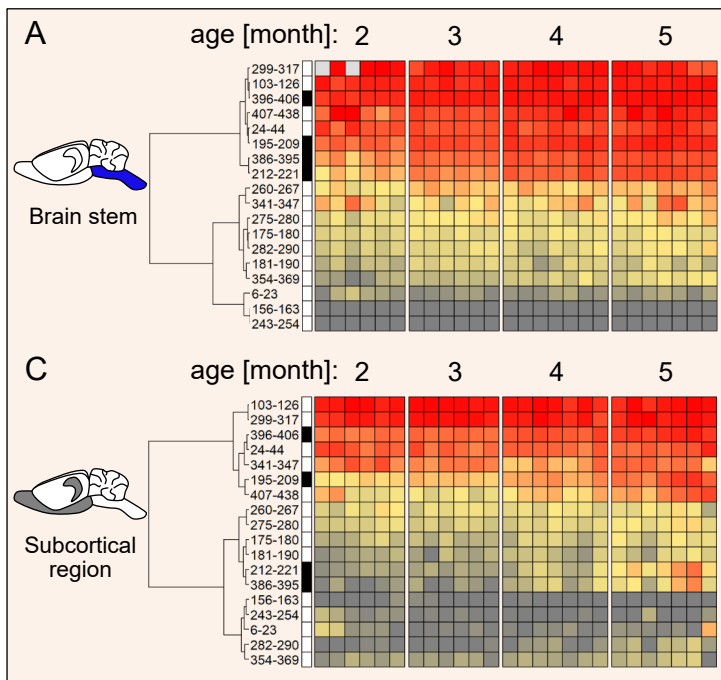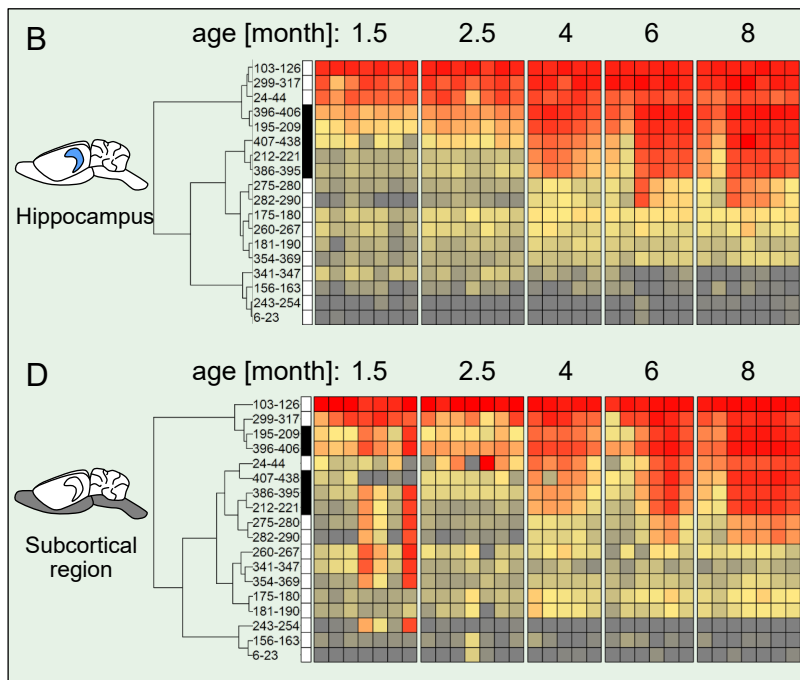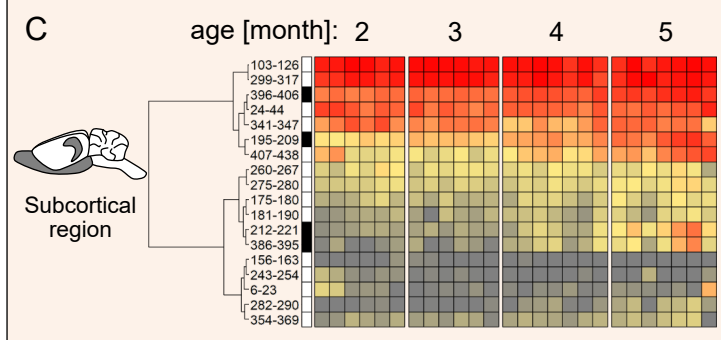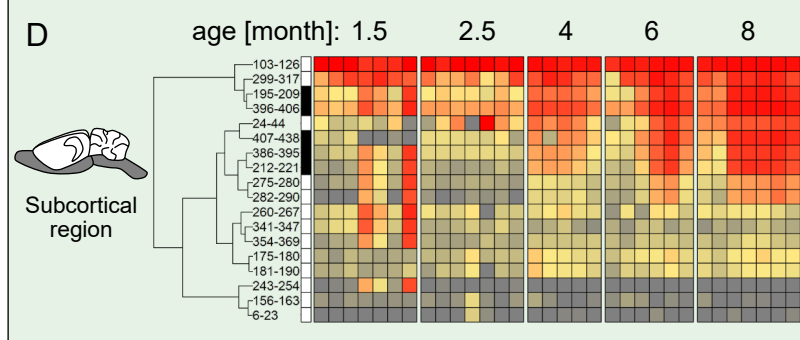

modification extent: 0% 50% 100% modified ■ peptides with highest progression

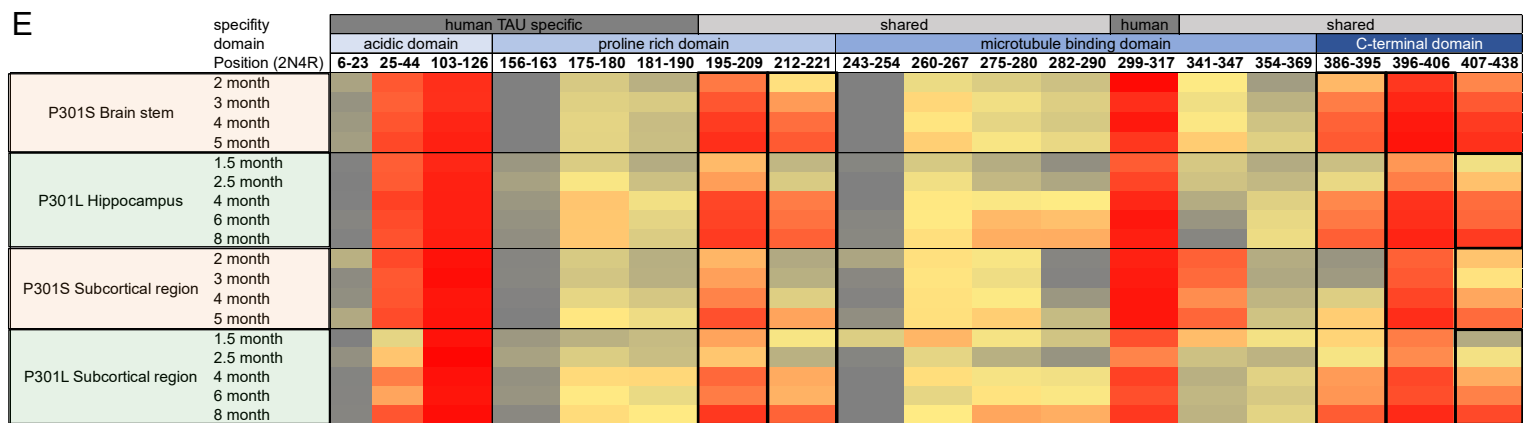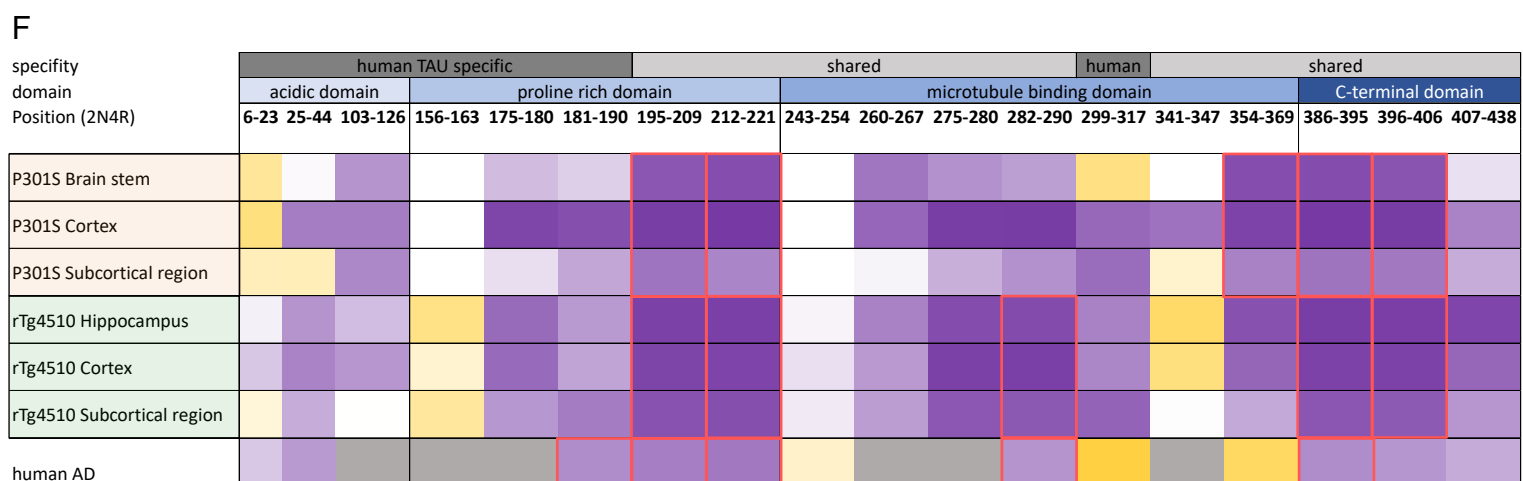

Pearson correlation: 1 no correlation -1

Average top 5 peptides

not monitored
